# Supplementary material for: Modelling crop production, river low flow, and sediment load trade-offs under agroforestry land-use scenarios in Nyangores catchment, Kenya
Source: Frontiers journal article supplement (doi:10.3389/ffgc.2022.1046371), 2022-12-05
Supplement: downloadfile [file 1046371]

| Objective | Scenario1 | Scenario2 | Scenario3 |
| --- | --- | --- | --- |
| MAM | -5.2% | +14% | +5% |
| Sed_yld | -66% | -78% | -41% |
| Soy_yld | -11.4% | -3.4% | -2.9% |
| Mai_yld | -12.8% | -3.8% | -3% |

Table 1: Summary of performance of all the Scenarios under the various objectives. A negative sign indicates a reduction/deterioration with reference to an objective while a positive sign indicates an increase/improvement
